# Supplementary material for: Ferrocene-Modified Block Copolymers for the Preparation of Smart Porous Membranes
Source: Polymers (Basel). 2017 Oct 8;9(10):491. doi: 10.3390/polym9100491 (PMC6418580; doi:10.3390/polym9100491)
Supplement: Supplementary file 1 [file polymers-09-00491-s001.docx]

**Supporting Information**


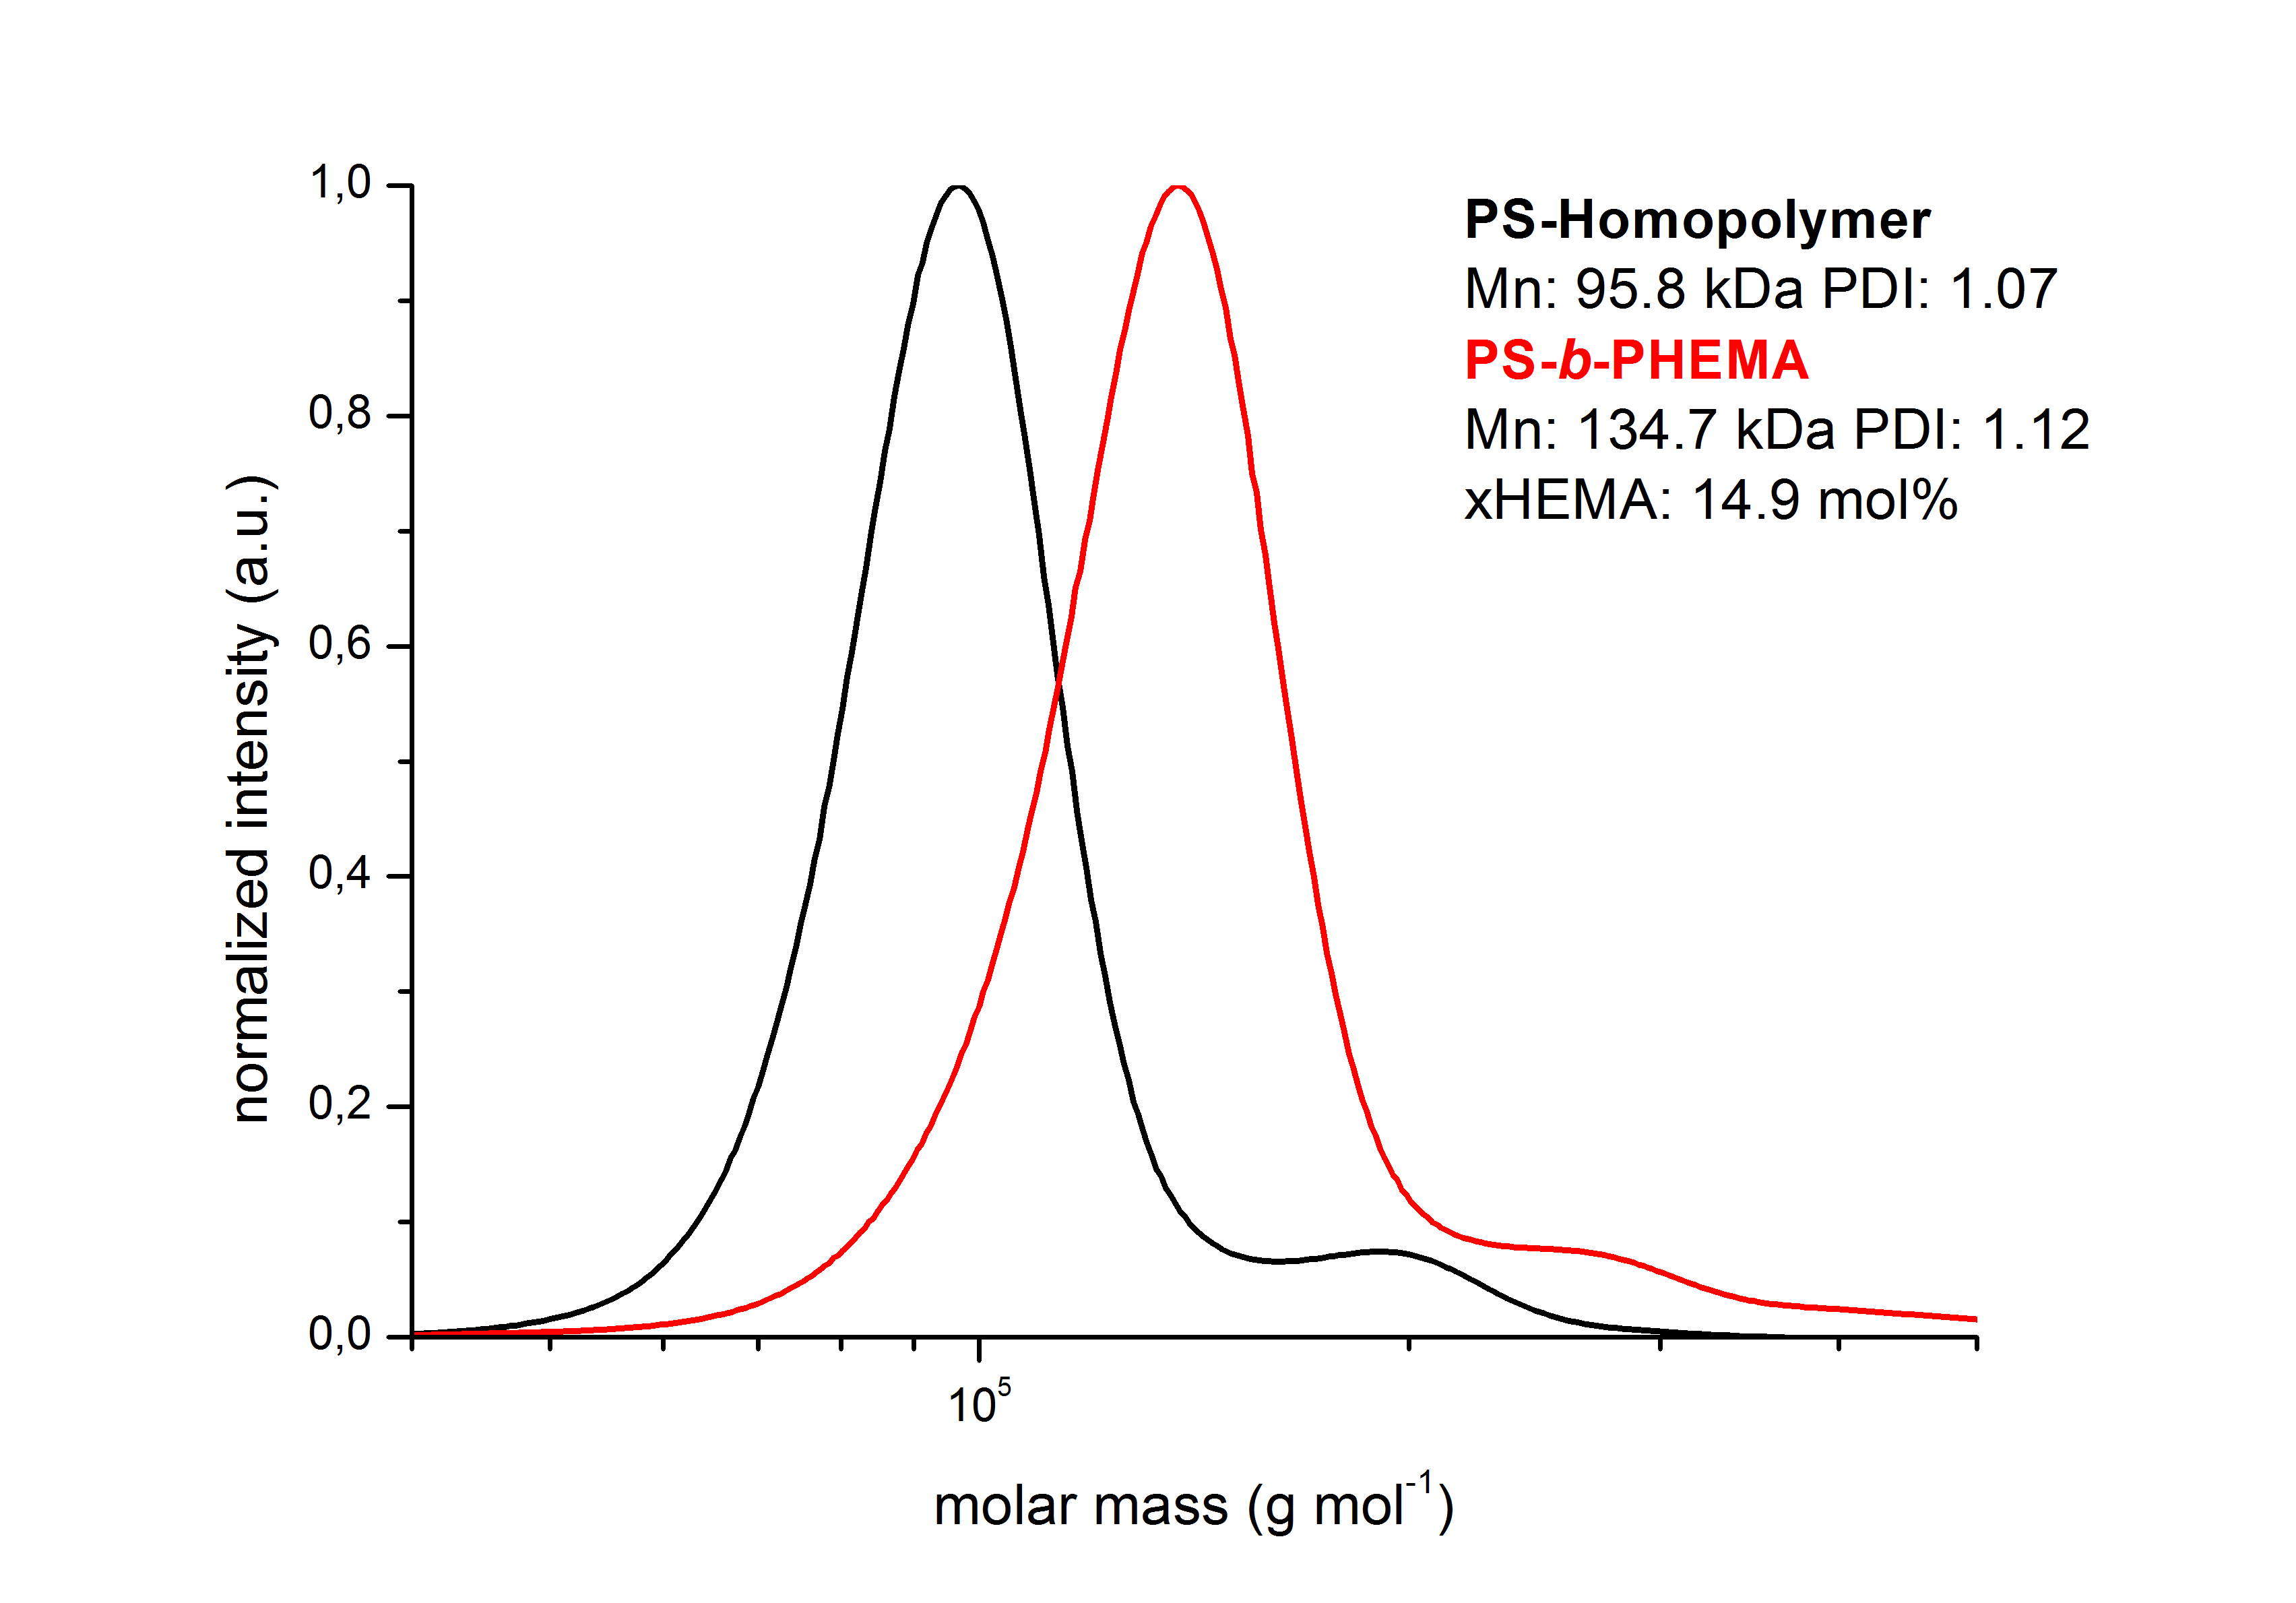

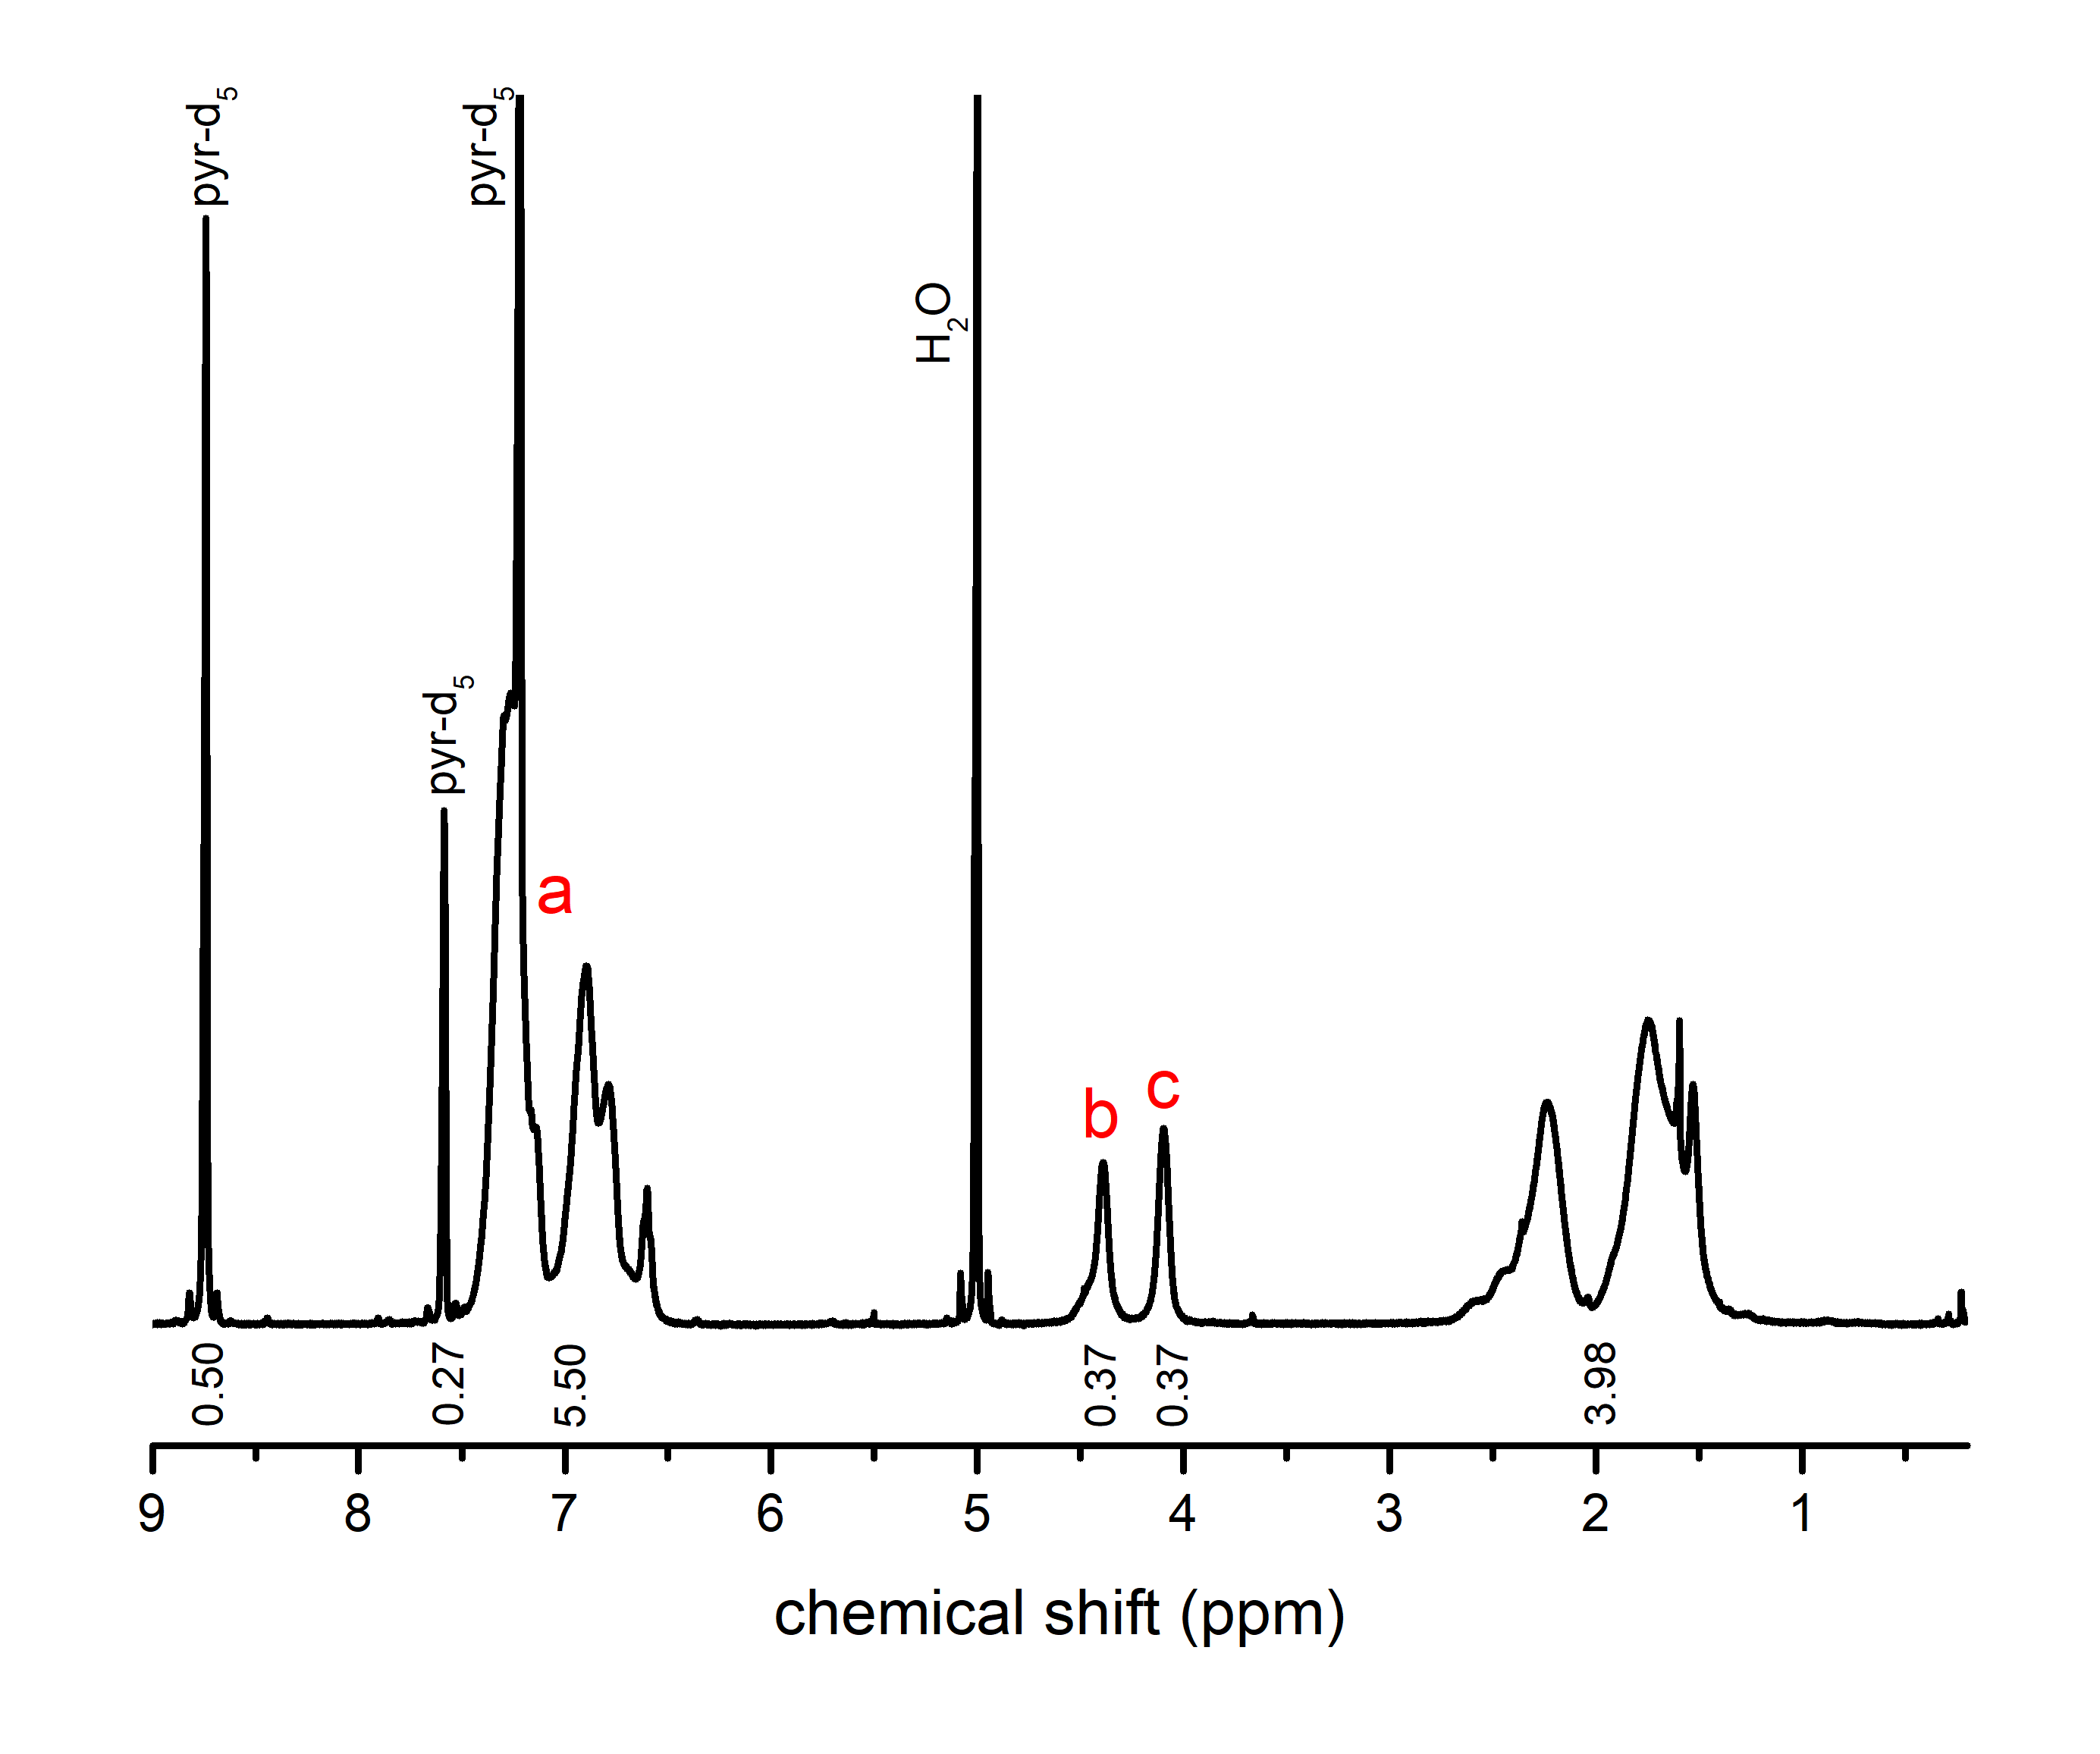


**Figure S1.** SEC in DMF/LiCl and 1H NMR in pyridine-d5 spectra of PS82-b-PHEMA18105.

**
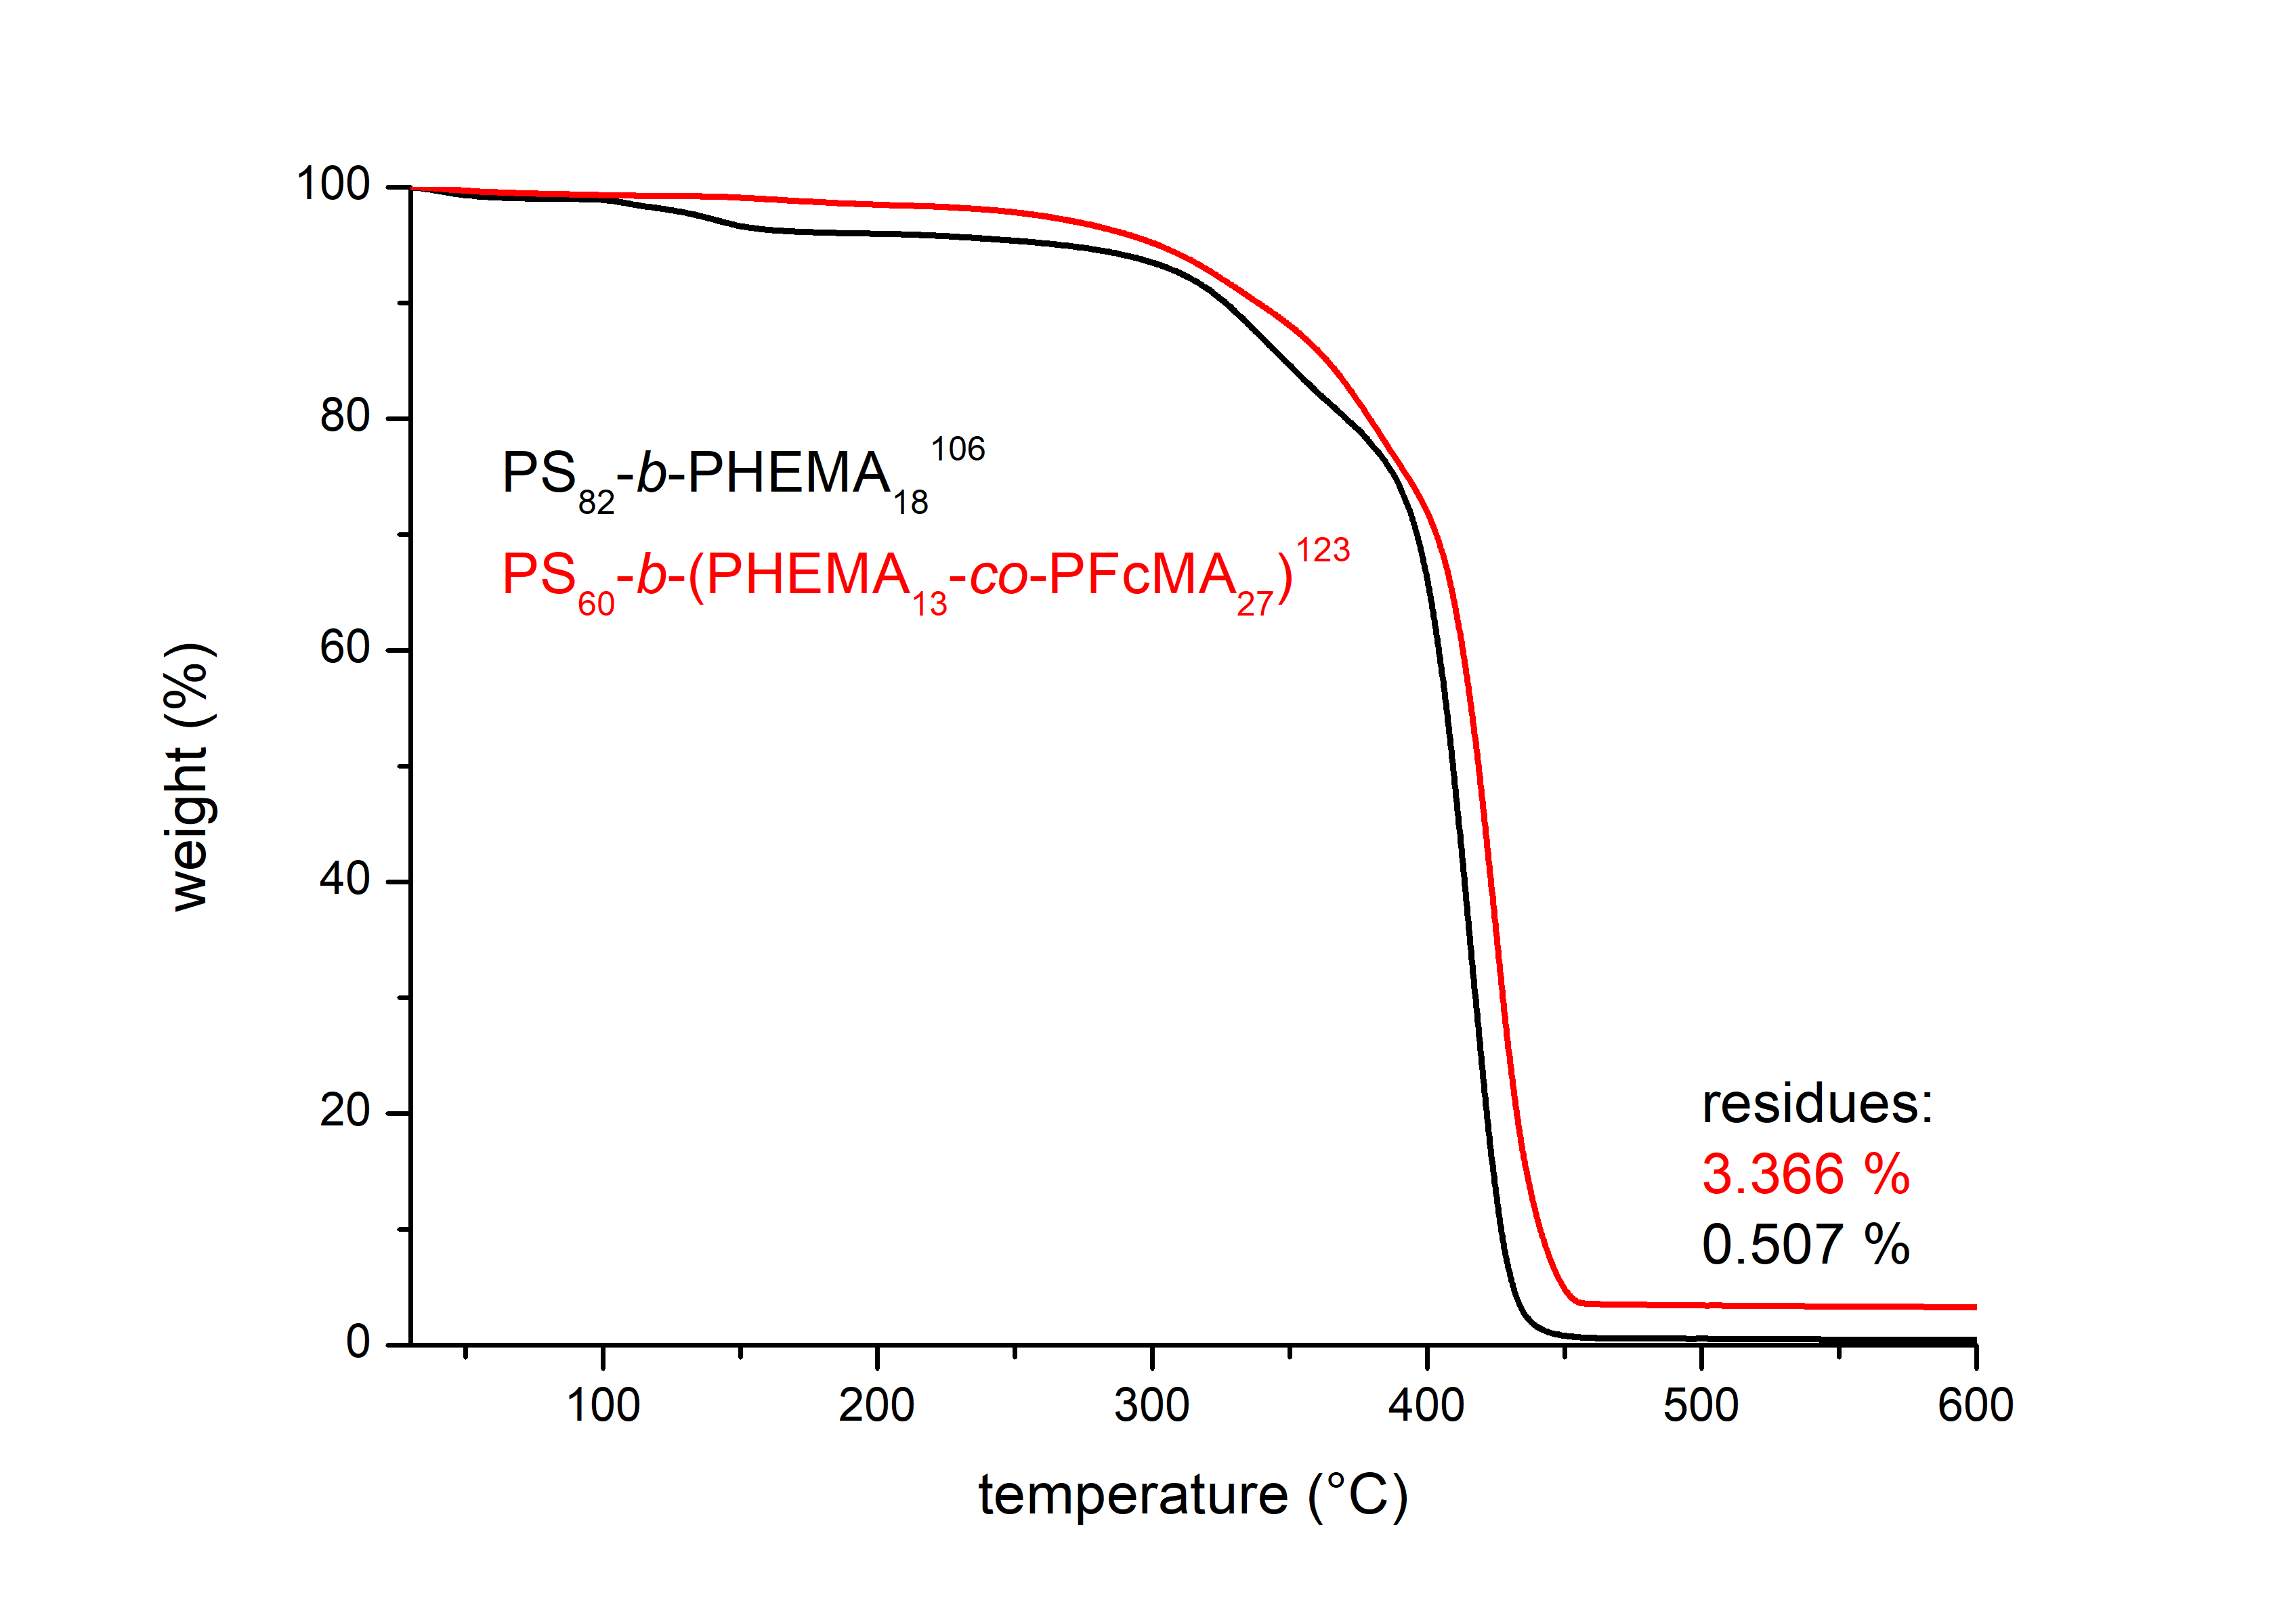

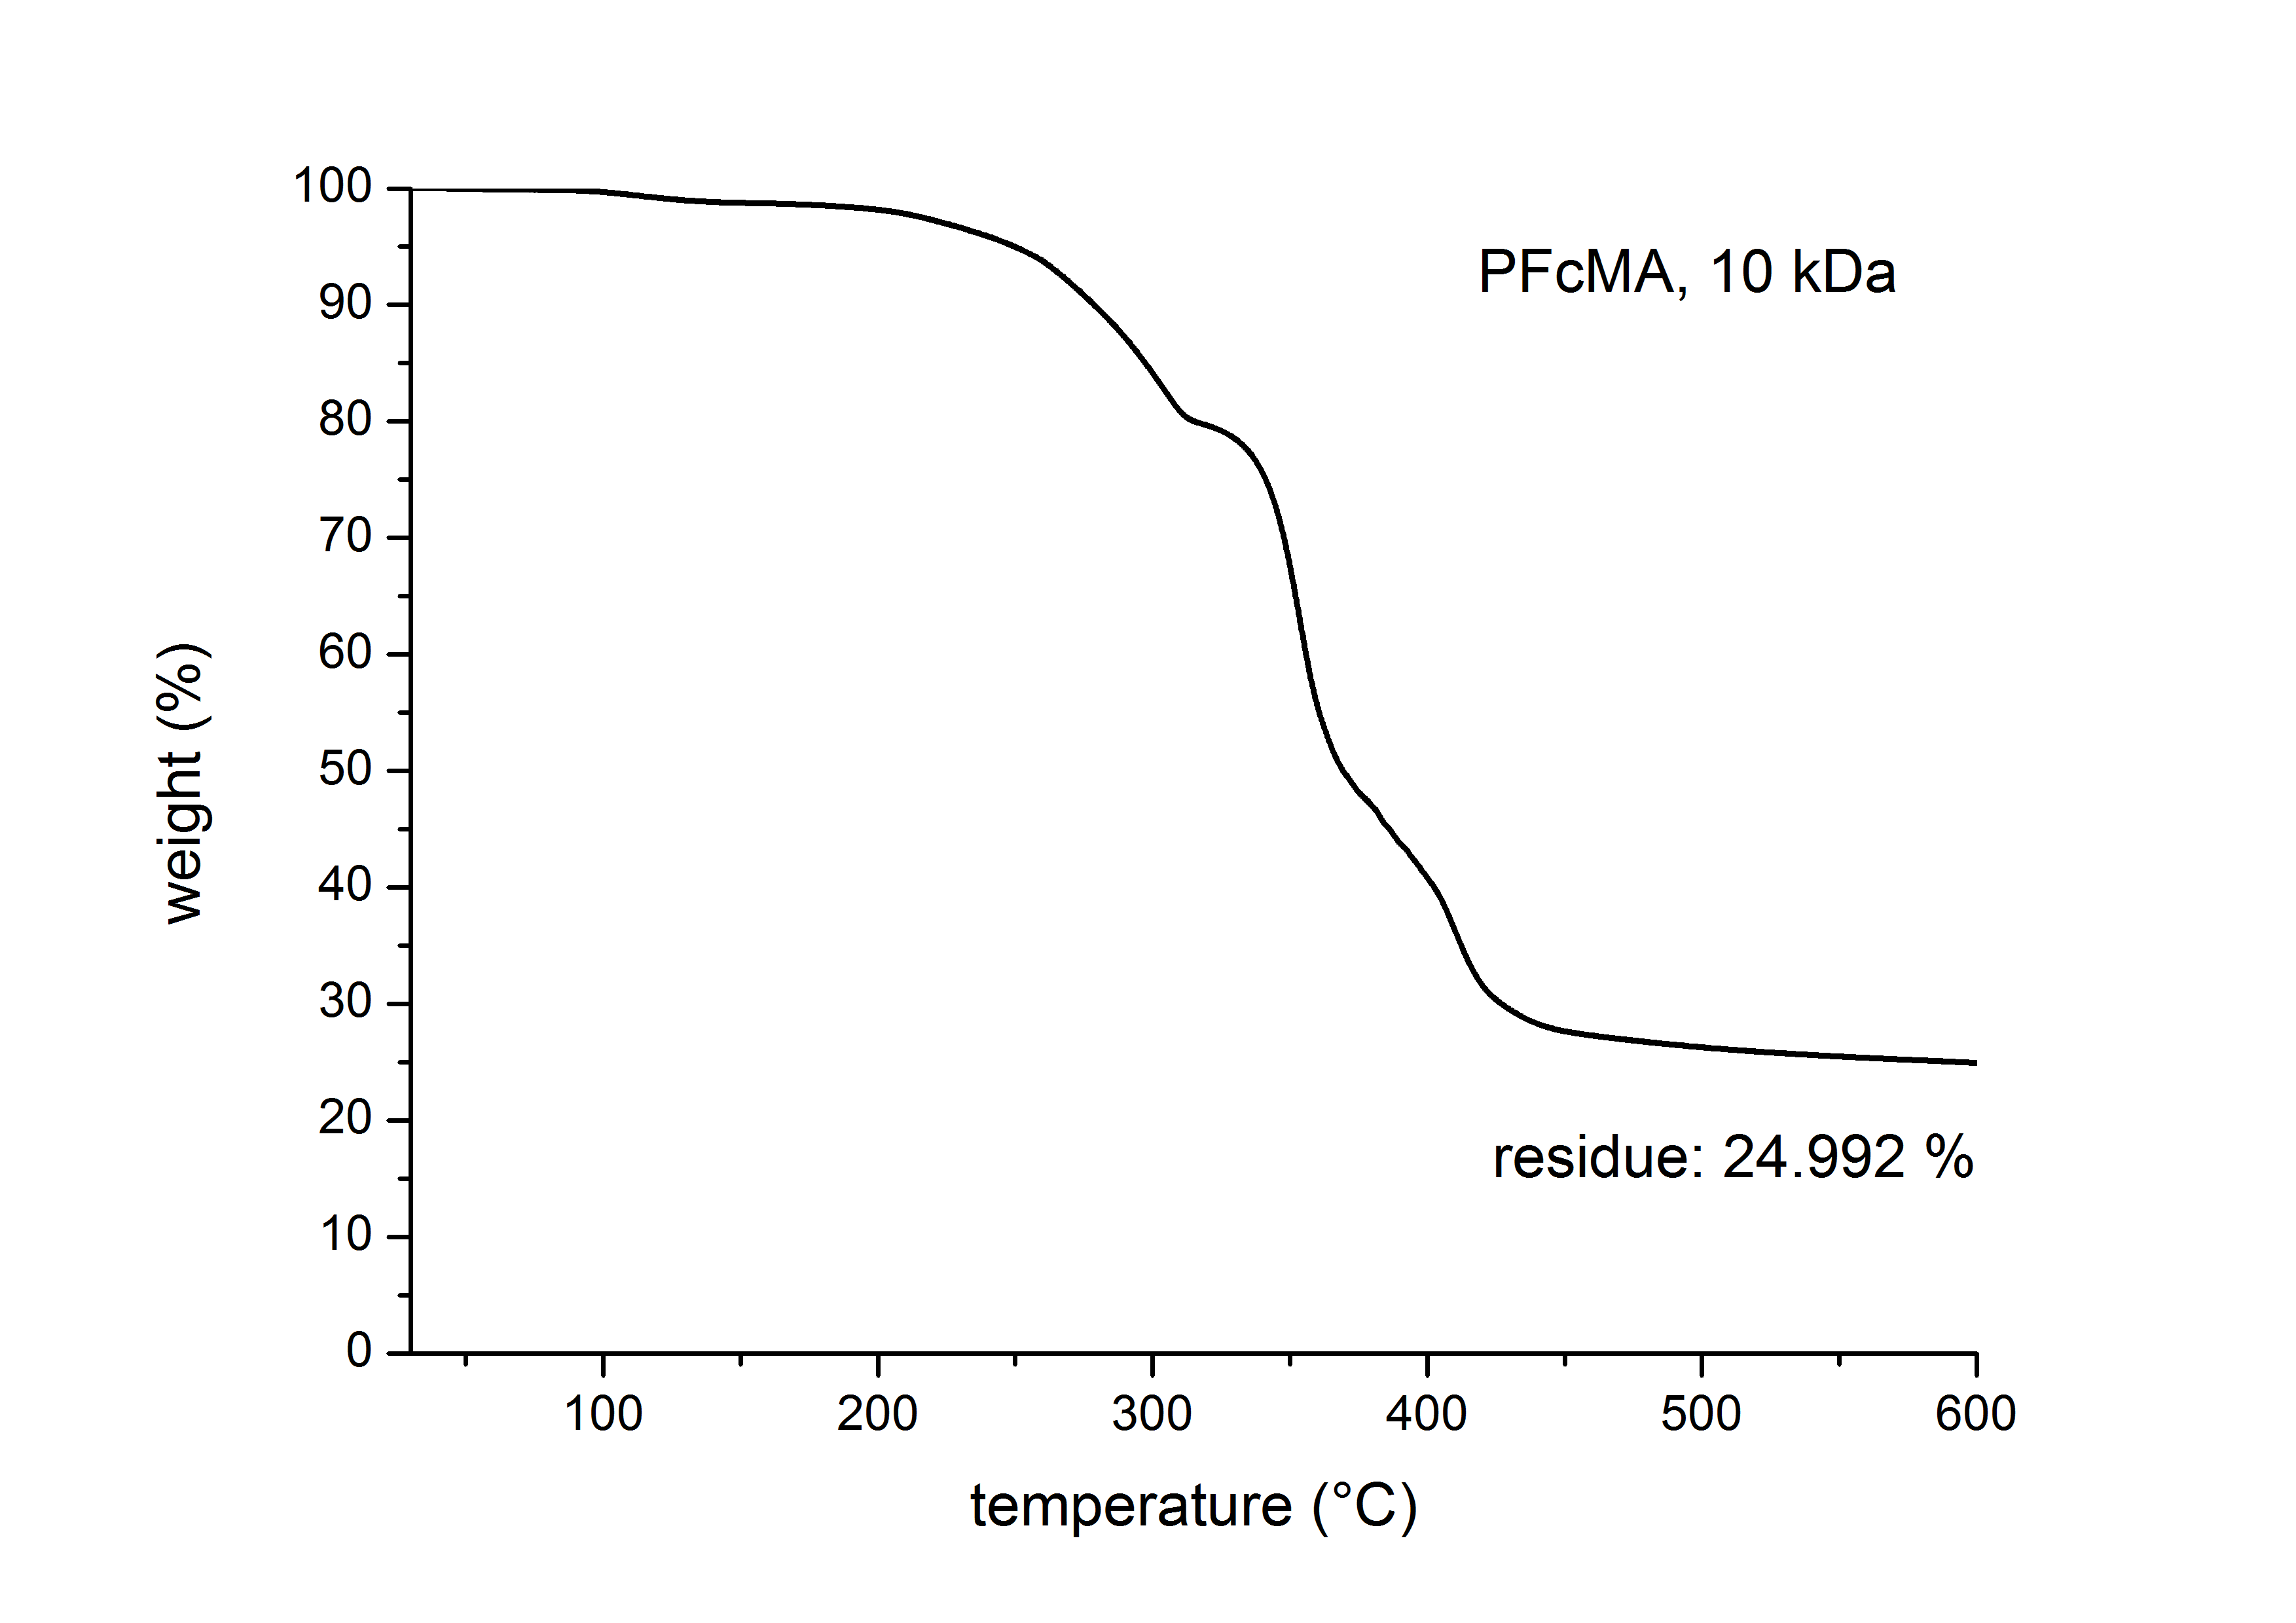
**

**Figure S2.** Left: TGA of PS82-*b*-PHEMA18106 (black) and of PS60-*b*-(PHEMA13-*co*-PFcMA27)123 (red). Right: TGA of PFcMA homopolymer with a molar mass of 10 kg mol-1. The TGA was performed starting from room temperature ending at 600 °C with a heating rate of 10 K min-1.


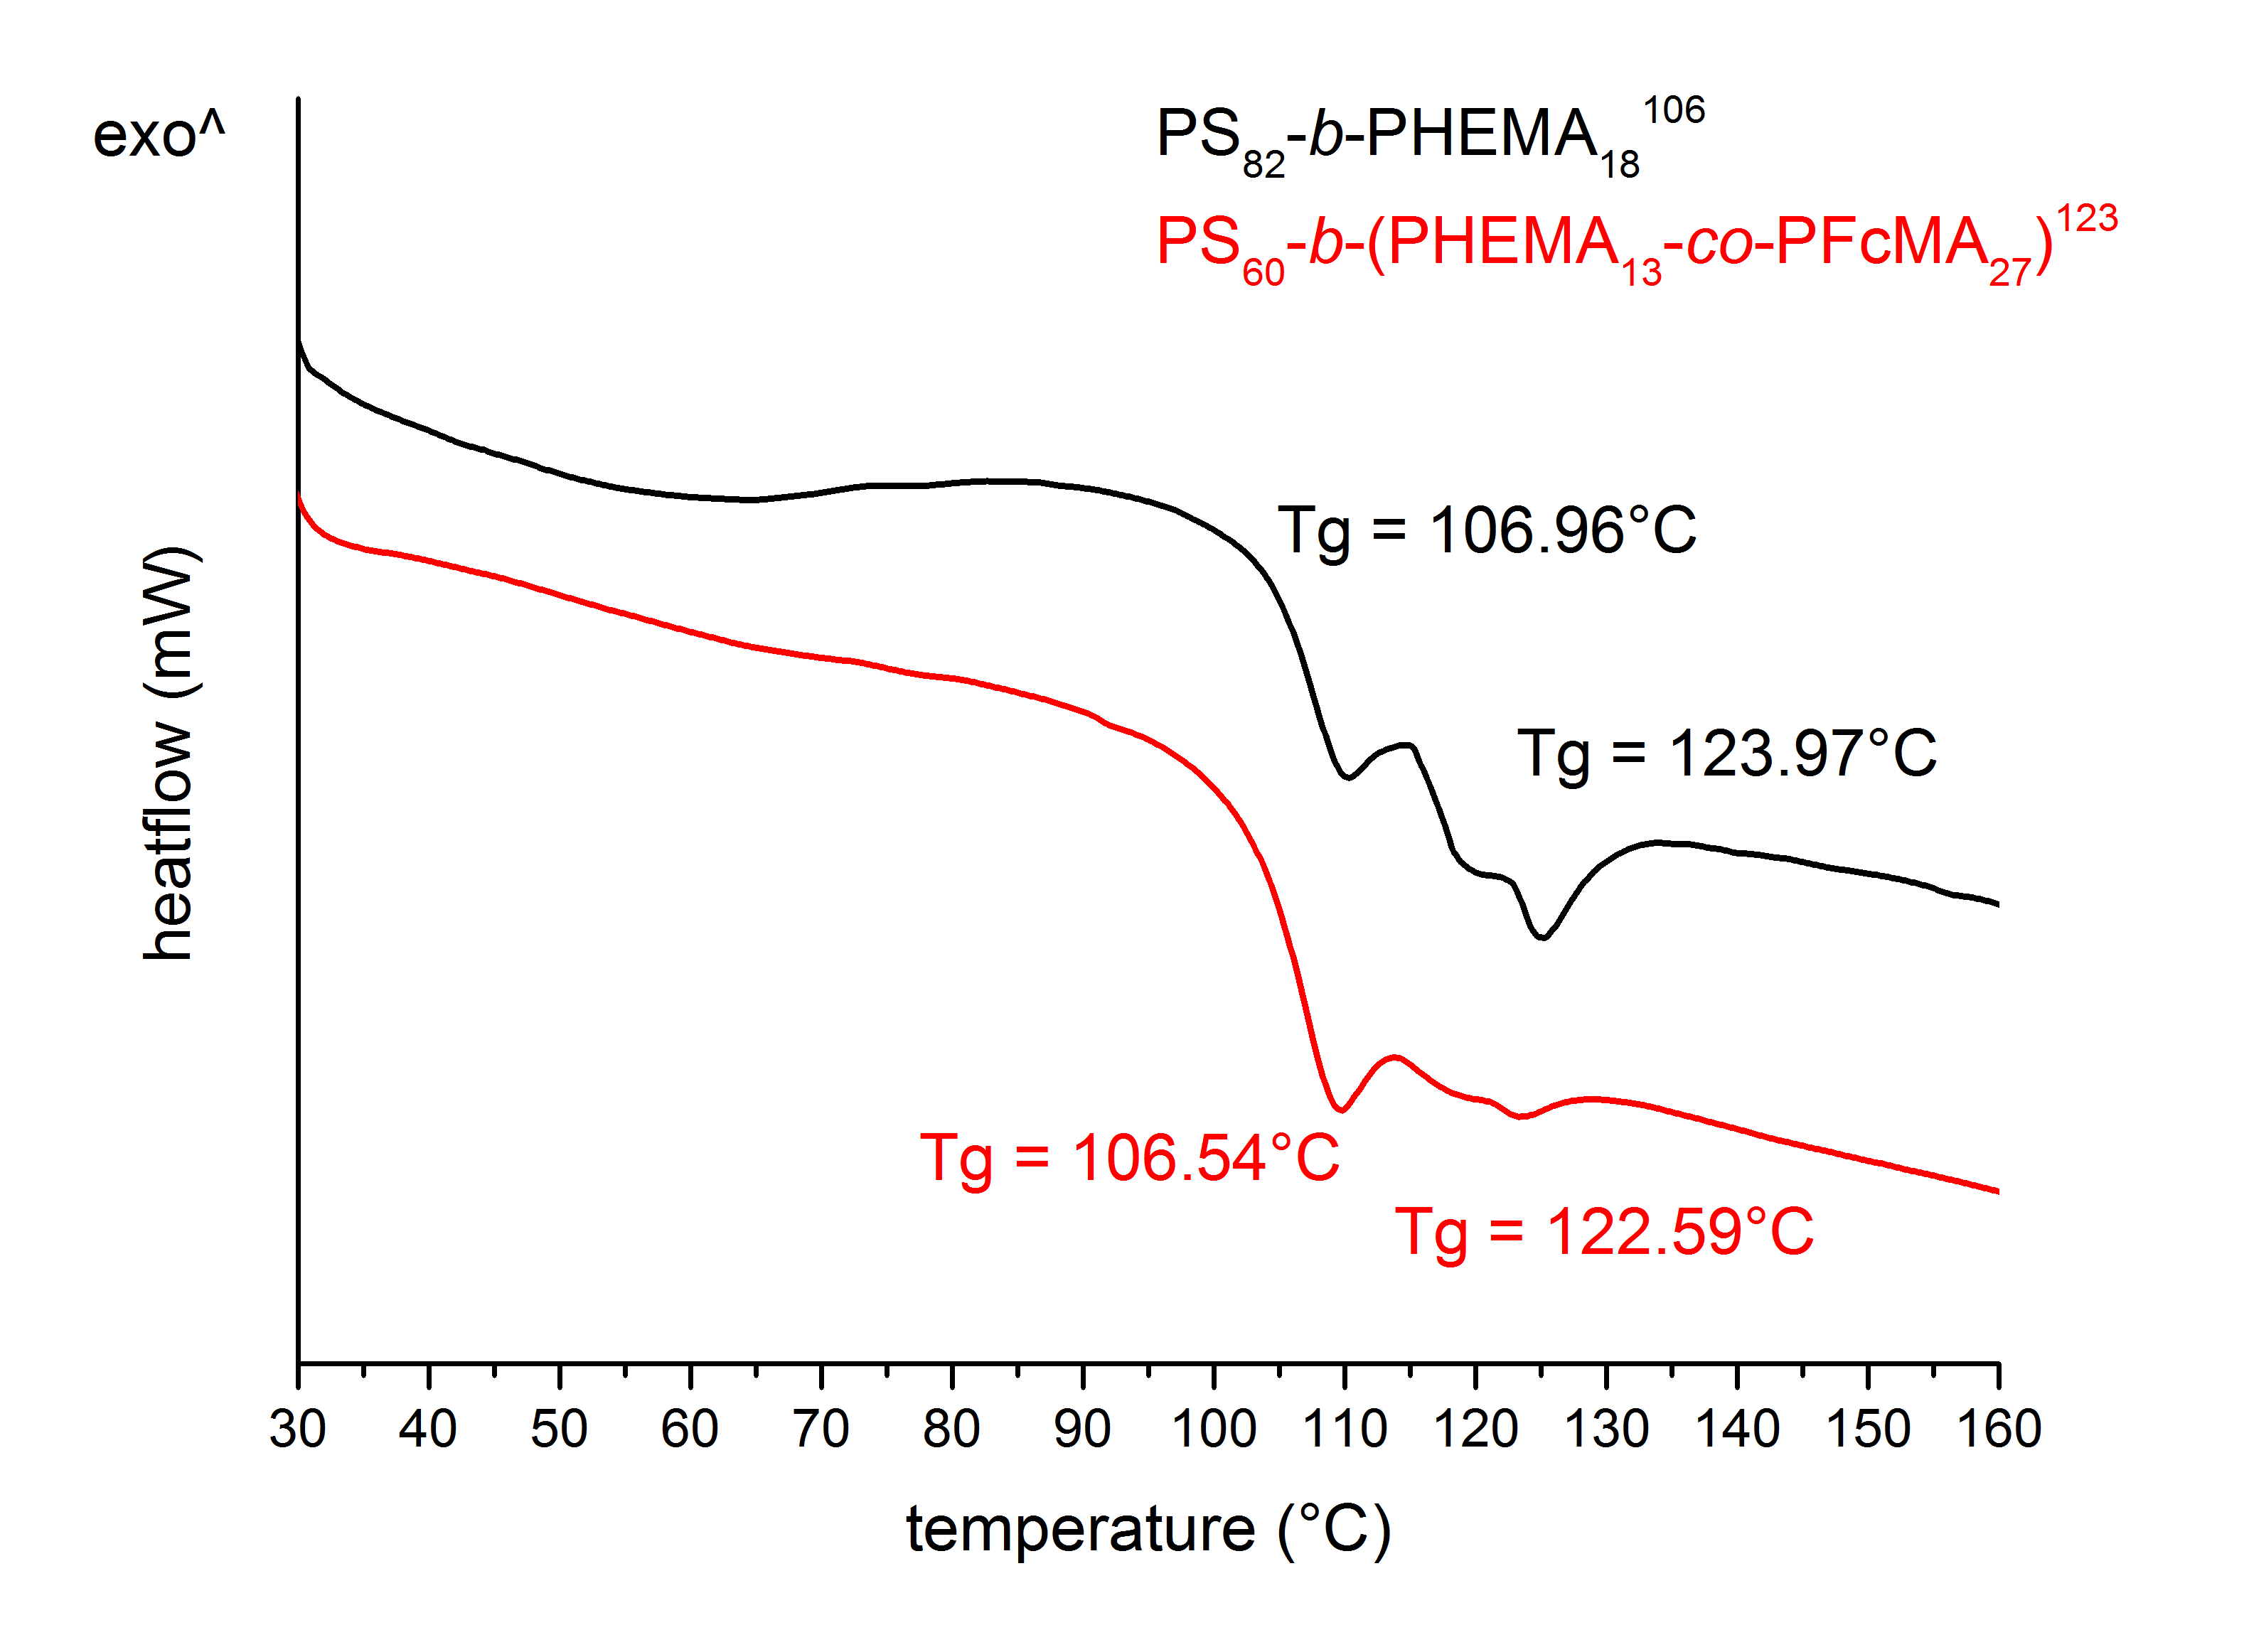

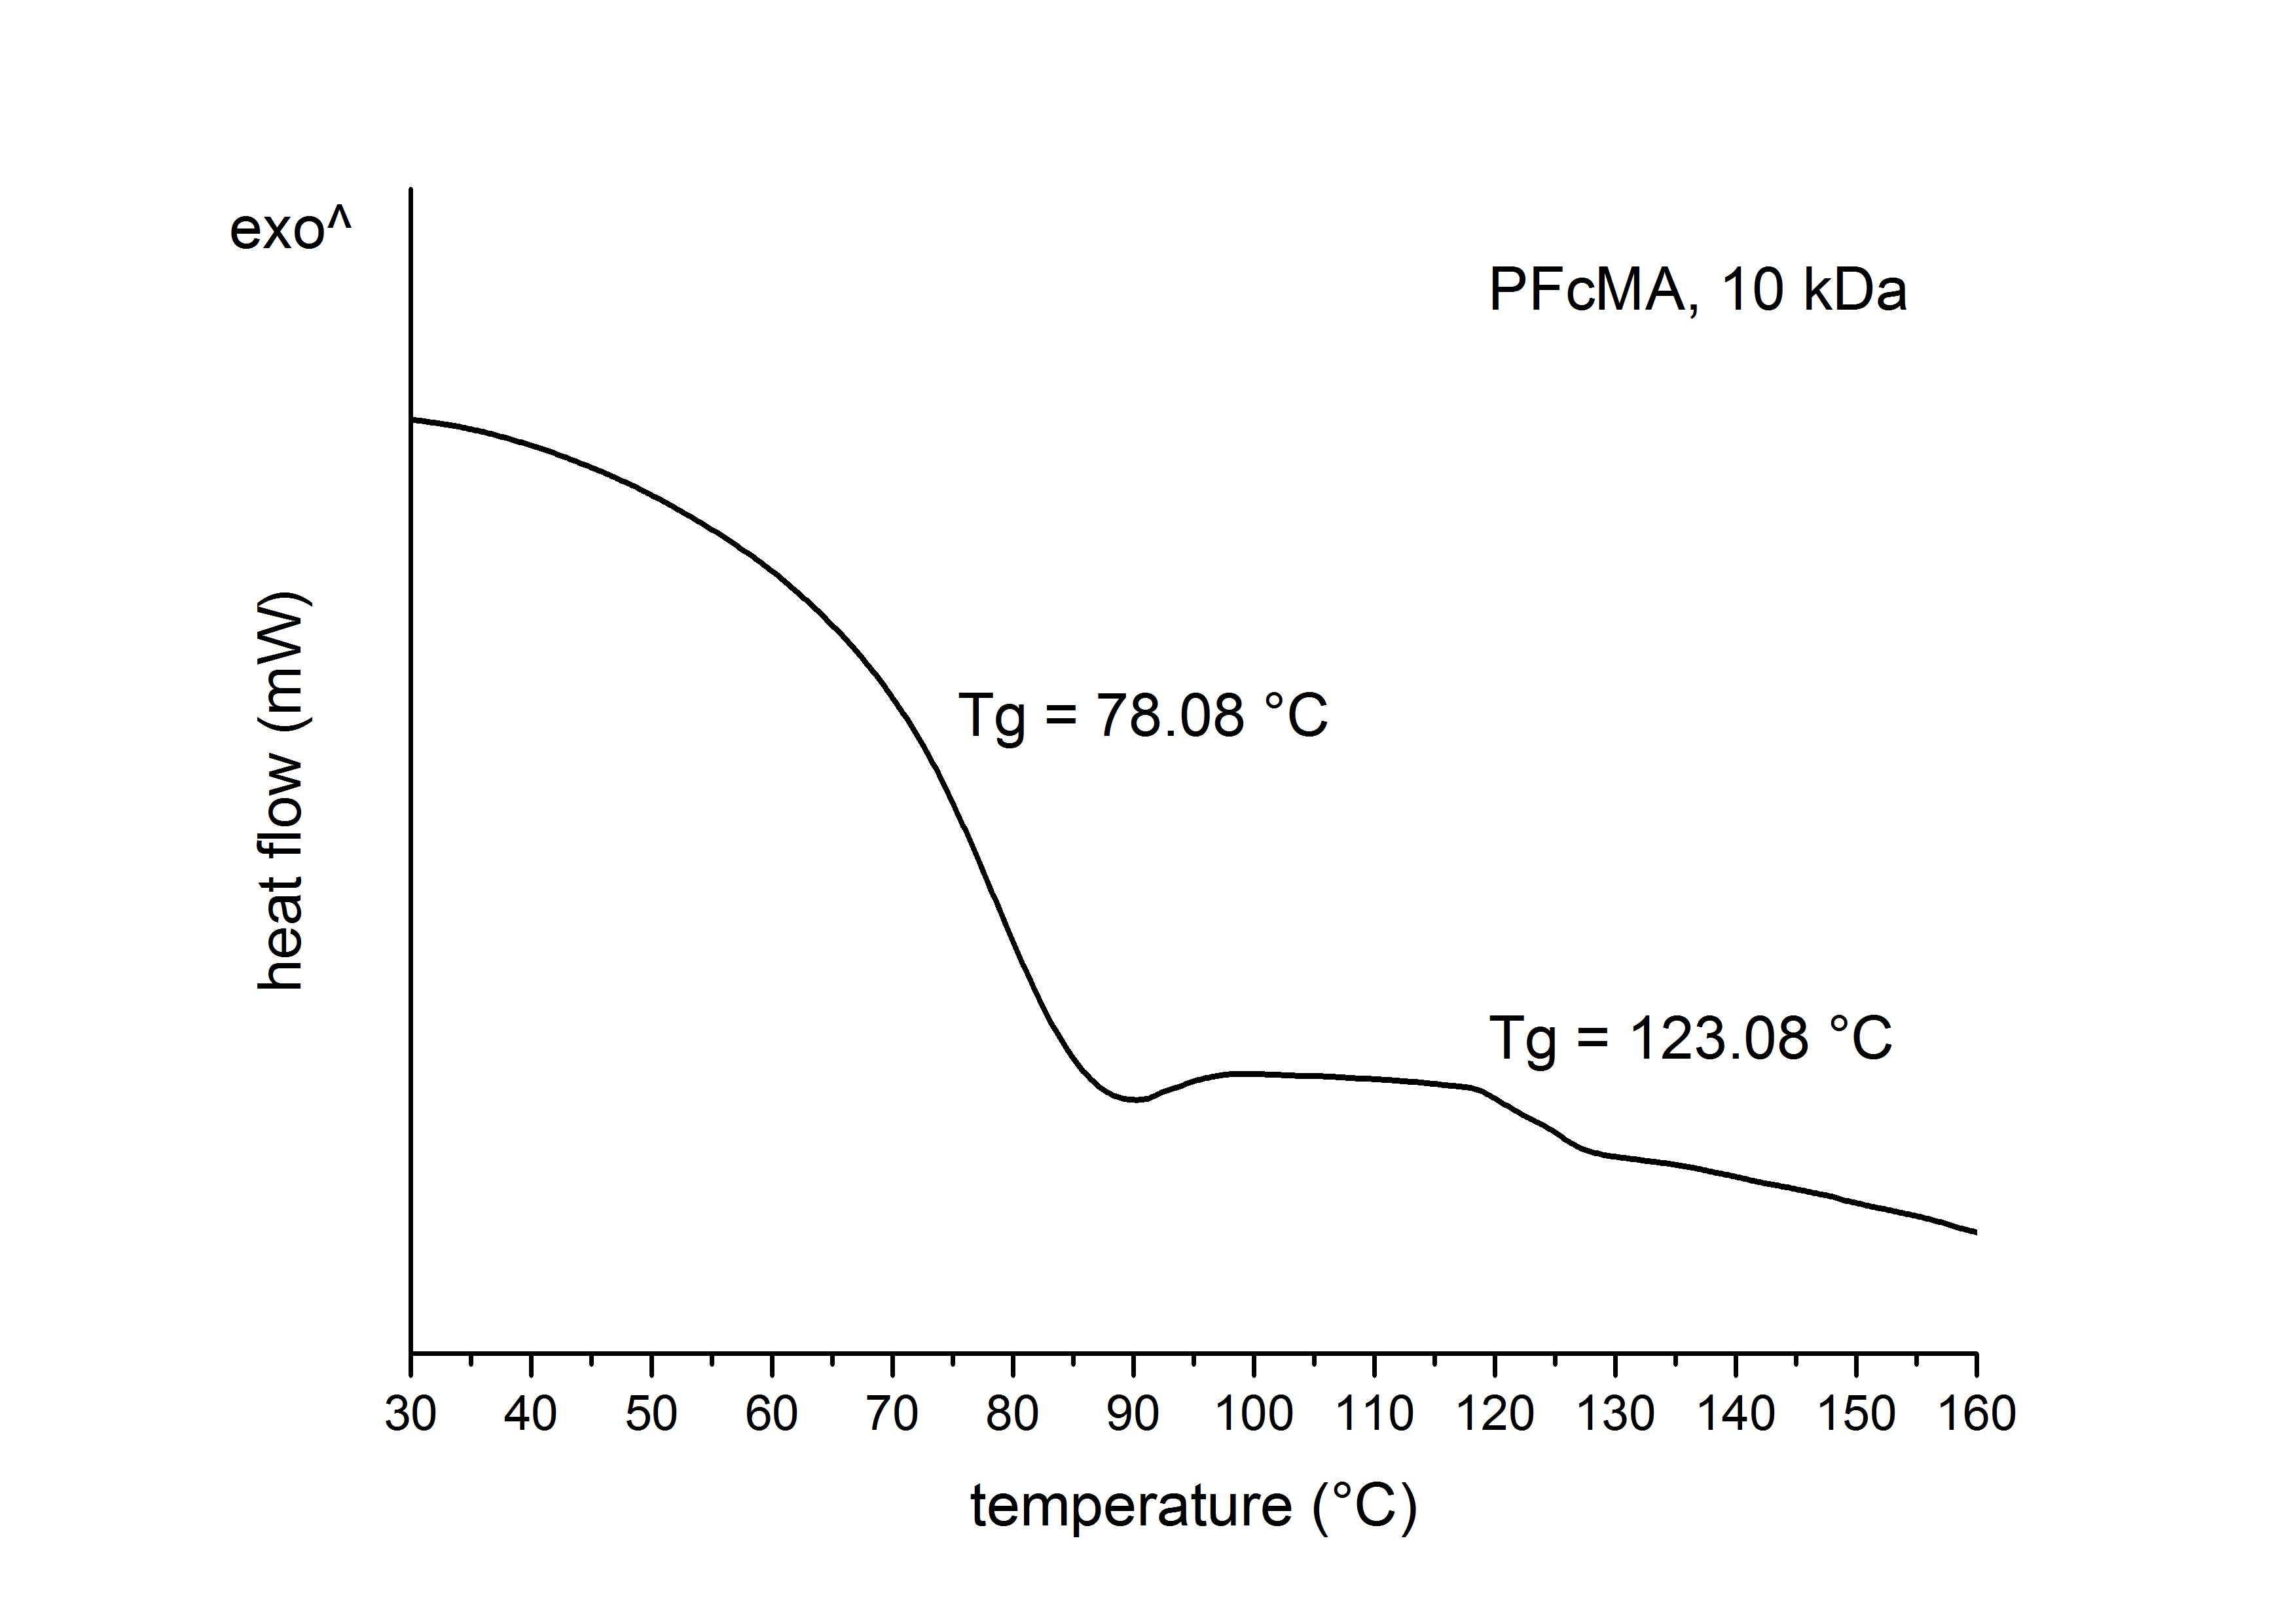


**Figure S3.** Left: Thermogram of precursor PS82-*b*-PHEMA18106 and of ferrocene functionalized PS60-*b*-(PHEMA13-*co*-PFcMA27)123. Right: Thermogram of PFcMA homopolymer with a molar mass of 10 kg mol-1. The DSC was performed starting from room temperature ending at 180°C with a heating rate of 10 K min-1.


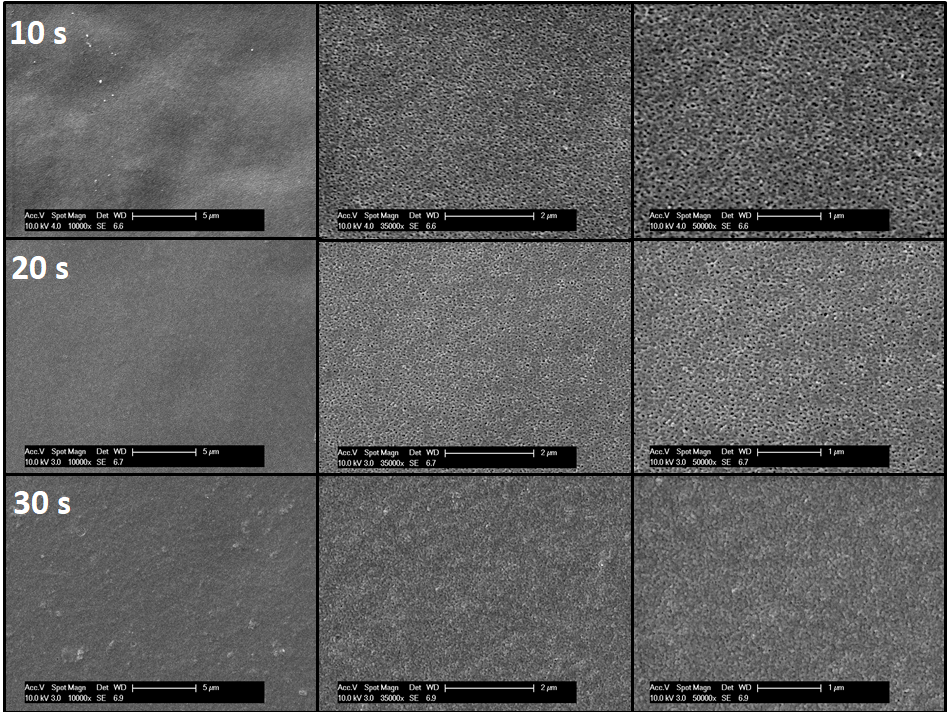


**Figure S4.** SEM images of ferrocene-functionalized block copolymer membranes prepared of a 1:1 wt % mixture of PS75-*b*-PHEMA25112 and PS64-*b*-(PHEMA12-*co*-PFcMA24)132 at different evaporation times and different magnitudes. The sample was coated with gold prior SEM investigation.





**Figure S5.** SEM image of oxidized block copolymer membrane prepared of a 2:1 wt % mixture of PS82-b-PHEMA18110 and PS60-*b*-(PHEMA13-co-PFcMA27)123 at an evaporation time of 30s after water flux measurement. The membrane was oxidized using a 0.2 wt % FeCl3 solution in water. The sample was coated with gold prior SEM investigation.


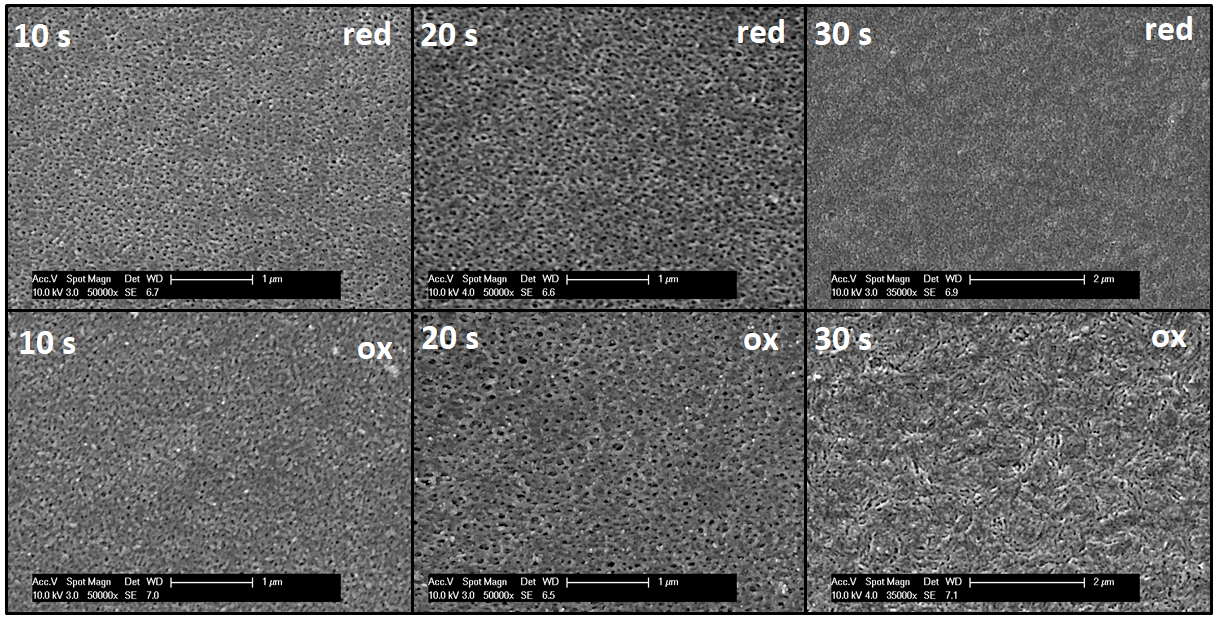


**Figure S6.** SEM image of oxidized block copolymer membrane prepared of a 1:1 wt% mixture of PS75-*b*-PHEMA25112 and PS64-*b*-(PHEMA12-*co*-PFcMA24) at different evaporation times before and after oxidation. The membrane was oxidized using a 0.2 wt % FeCl3 solution in water. The sample was coated with gold prior SEM investigation.
